# Supplementary material for: rs4143815-PDL1, a New Potential Immunogenetic Biomarker of Biochemical Recurrence in Locally Advanced Prostate Cancer after Radiotherapy
Source: MDPI journal article supplement (doi:10.3390/ijms20092082), 2019-04-27
Supplement: s1 [file s1]

# rs4143815-PDL1, a New Potential Immunogenetic Biomarker of Biochemical Recurrence in Locally Advanced Prostate Cancer after Radiotherapy

**Supplementary table 1.** Time-dependent distributions of BCR in the discovery set and in the replication set. All events are reported.

| Period (months) | Discovery set |      |                                   | Replication set |      |                                  |
|-----------------|---------------|------|-----------------------------------|-----------------|------|----------------------------------|
|                 | n             | %    |                                   | n               | %    |                                  |
| <12             | 16            | 19.5 | BCR < 60 months:<br>68 (82.93%)   | 5               | 15.6 | BCR < 60 months:<br>25 (78.12%)  |
| ≥12 <24         | 20            | 24.4 |                                   | 7               | 21.9 |                                  |
| ≥24 <36         | 15            | 18.3 |                                   | 3               | 9.4  |                                  |
| ≥36 <48         | 12            | 14.6 |                                   | 7               | 21.9 |                                  |
| ≥48 <60         | 5             | 6.1  |                                   | 3               | 9.4  |                                  |
| ≥60 <72         | 7             | 8.5  | BCR 60-120 months:<br>12 (14.63%) | 2               | 6.3  | BCR 60-120 months:<br>7 (21.88%) |
| ≥72 <84         | 1             | 1.2  |                                   | 3               | 9.4  |                                  |
| ≥84 <96         | 0             | 0.0  |                                   | 1               | 3.1  |                                  |
| ≥96 <108        | 2             | 2.4  |                                   | 0               | 0.0  |                                  |
| ≥108 <120       | 2             | 2.4  |                                   | 1               | 3.1  |                                  |
| ≥120            | 2             | 2.4  | BCR ≥120 months:<br>2 (2.44%)     | 0               | 0.0  | BCR ≥120 months:<br>0 (0.0%)     |

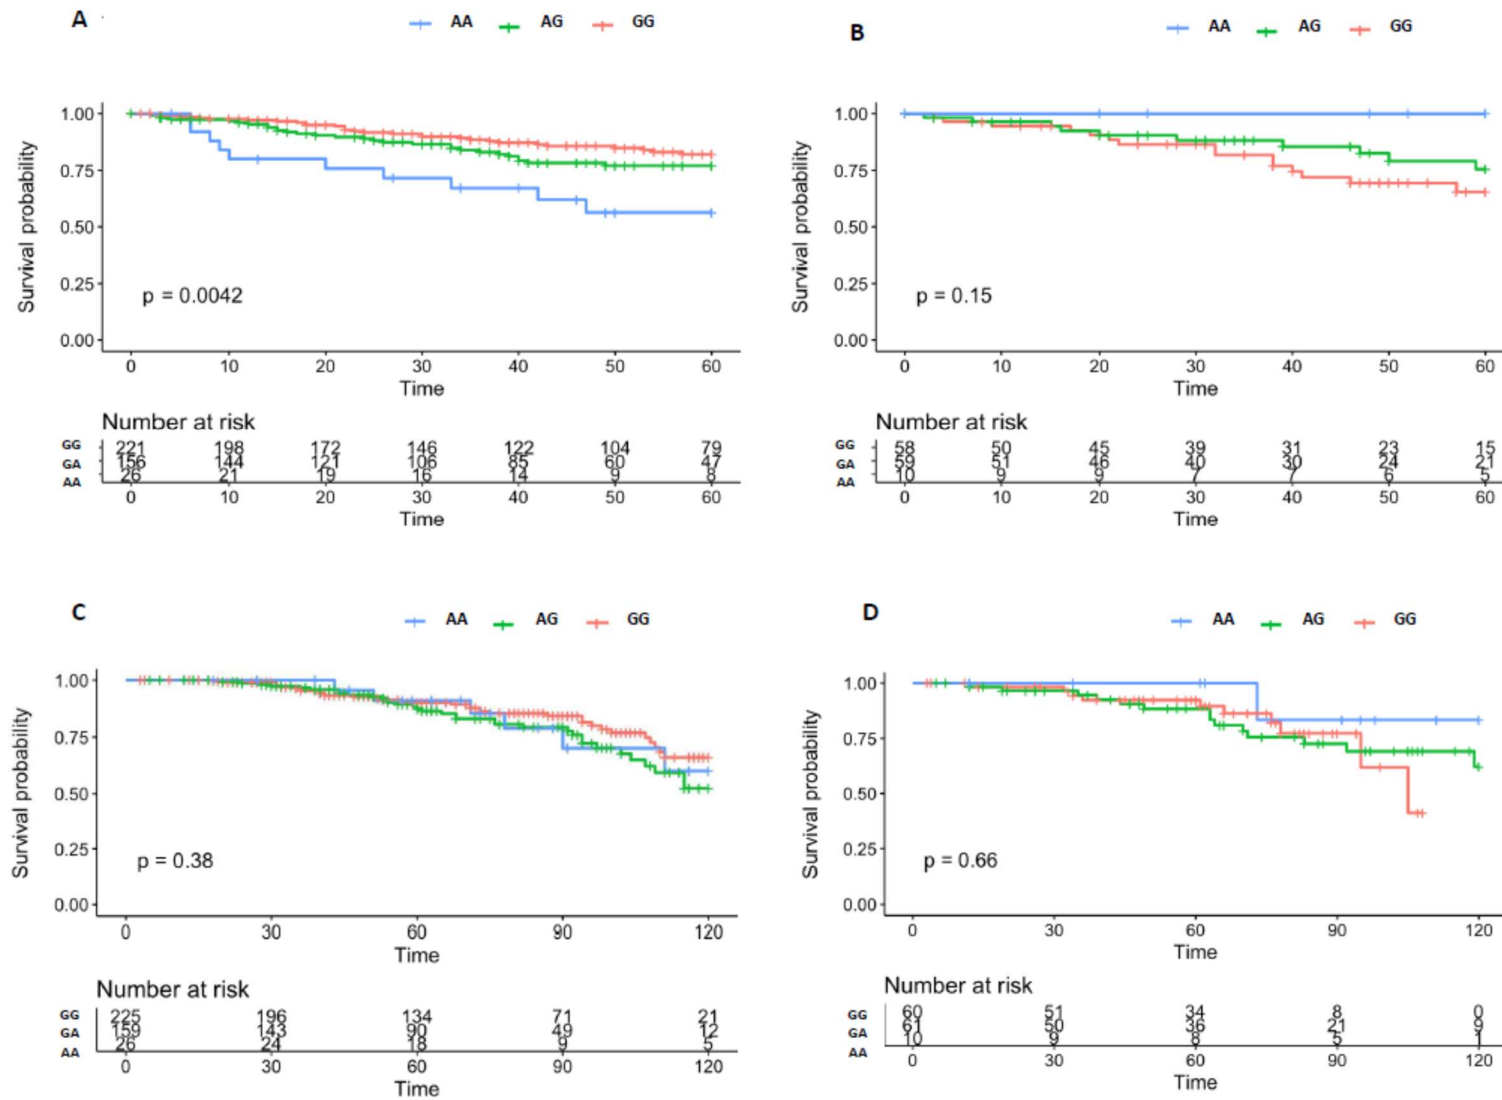

**Supplementary Figure 1.** Kaplan-Meier curves of 5-year BCR according to rs1411262-*PDL1* in the training set (A) and in the replication set (B) and Kaplan-Meier curves of 10-year OS according to rs1411262-*PDL1* in the training set (C) and in the replication set (D).
